# Supplementary material for: Ciliated neurons lining the central canal sense both fluid movement and pH through ASIC3
Source: PubMed Central journal article supplement (PMC4729841; doi:10.1038/ncomms10002), 2016-01-08
Supplement: ncomms10002-s1.pdf [file ncomms10002-s1.pdf]

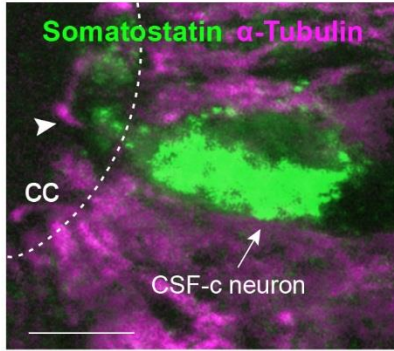

**Supplementary Figure 1. Somatostatin immunoreactive CSF-c neuron.** Confocal image from a transverse spinal cord section with a CSF-c neuron (arrow) expressing somatostatin (green). A cilium (arrowhead) extending from the bulb-like ending is immunoreactive to  $\alpha$ -tubulin (magenta). Scale bar, 10  $\mu$ m.
